1 Full title:

2 **Imputation of canine genotype array data using 365 whole-genome sequences improves**  
3 **power of genome-wide association studies**

4

5 Short title:

6 **Use of imputation in canine genome-wide association studies**

7

8 Jessica J. Hayward<sup>1\*</sup>, Michelle E. White<sup>1</sup>, Michael Boyle<sup>2</sup>, Laura M. Shannon<sup>3</sup>, Margret L. Casal<sup>4</sup>,

9 Marta G. Castelhana<sup>5</sup>, Sharon A. Center<sup>5</sup>, Vicki N. Meyers-Wallen<sup>1,6</sup>, Kenneth W. Simpson<sup>5</sup>,

10 Nathan B. Sutter<sup>7</sup>, Rory J. Todhunter<sup>5</sup>, Adam R. Boyko<sup>1</sup>

11

12 <sup>1</sup>Department of Biomedical Sciences, College of Veterinary Medicine, Cornell University, Ithaca,  
13 New York, United States of America

14 <sup>2</sup>Cornell Center for Astrophysics and Planetary Science, Cornell University, Ithaca, New York,  
15 United States of America

16 <sup>3</sup>Department of Horticultural Science, University of Minnesota, St Paul, Minnesota, United States  
17 of America

18 <sup>4</sup>School of Veterinary Medicine, University of Pennsylvania, Philadelphia, Pennsylvania, United  
19 States of America

20 <sup>5</sup>Department of Clinical Sciences, College of Veterinary Medicine, Cornell University, Ithaca, New  
21 York, United States of America

22 <sup>6</sup>Baker Institute for Animal Health, College of Veterinary Medicine, Cornell University, Ithaca, New  
23 York, United States of America

24 <sup>7</sup>Biology Department, La Sierra University, Riverside, California, United States of America

25

26

27 \* Corresponding author

28 E-mail: [jessica.hayward@cornell.edu](mailto:jessica.hayward@cornell.edu) (JJH)

29 **Abstract:**

30 Genomic resources for the domestic dog have improved with the widespread adoption of a 173k  
31 SNP array platform and updated reference genome. SNP arrays of this density are sufficient for  
32 detecting genetic associations within breeds but are underpowered for finding associations  
33 across multiple breeds or in mixed-breed dogs, where linkage disequilibrium rapidly decays  
34 between markers, even though such studies would hold particular promise for mapping complex  
35 diseases and traits. Here we introduce an imputation reference panel, consisting of 365 diverse,  
36 whole-genome sequenced dogs and wolves, which increases the number of markers that can be  
37 queried in genome-wide association studies approximately 130-fold. Using previously genotyped  
38 dogs, we show the utility of this reference panel in identifying novel associations and fine-  
39 mapping for canine body size and blood phenotypes, even when causal loci are not in strong  
40 linkage disequilibrium with any single array marker. This reference panel resource will improve  
41 future genome-wide association studies for canine complex diseases and other phenotypes.

42

43 **Author Summary:**

44 Complex traits are controlled by more than one gene and as such are difficult to map. For  
45 complex trait mapping in the domestic dog, researchers use the current array of 173,000 variants,  
46 with only minimal success. Here, we use a method called imputation to increase the number of  
47 variants – from 173,000 to 24 million – that can be queried in canine association studies. We use  
48 sequence data from the whole genomes of 365 dogs and wolves to accurately predict variants, in  
49 a separate cohort of dogs, that are not present on the array. Using dog body size, we show that  
50 the increase in variants results in an increase in mapping power, through the identification of new  
51 associations and the narrowing of regions of interest. This imputation panel is particularly  
52 important because of its usefulness in improving complex trait mapping in the dog, which has  
53 significant implications for discovery of variants in humans with similar diseases.

54

55 **Introduction:**

56 The modern domestic dog (*Canis lupus familiaris*) consists of over 500 breeds selected for  
57 diverse roles and subject to wildly different disease prevalences (1). A high quality reference  
58 genome (2–4) and affordable SNP genotyping arrays (5) have helped make the dog a powerful  
59 animal model for studying the genetics of complex traits and diseases. Of 719 traits genetic traits  
60 and disorders in the dog, 420 are potential models of human disease (<https://omi.org/home/>).  
61 With an average spacing of 1 SNP every 13kb, the CanineHD array (Illumina, San Diego, CA)  
62 has been successfully implemented in many genome-wide association studies (GWAS),  
63 especially within single breeds where linkage disequilibrium (LD) often extends beyond 1Mb (for  
64 example, see (6,7)). However, the results of many complex disease mapping studies in dogs  
65 have been underwhelming, with only one or a few significant loci identified (for example, see (8–  
66 10)). 57% of the 719 genetic traits and disorders in dogs are complex but the likely causal variant  
67 is known for only 27% of these (<https://omia.org/home/>).  
68 Recently, we used simulations to show that an increase in SNP density to 1 SNP every 2kb would  
69 improve power for canine complex trait GWAS (8). An increase in density can be achieved by the  
70 following: adding more SNPs to the CanineHD array, using whole genome sequencing (WGS), or  
71 using imputation to predict genotypes through the use of a reference panel created from WGS  
72 data. Of these, imputation is the most cost-effective option and has been used successfully in  
73 human and cattle GWAS, especially with the recent WGS efforts in these species (11,12).  
74 GWAS of canine morphological traits has been very successful, due to large effect sizes and long  
75 regions of LD as a result of recent selection in purebred dogs (13). Seventeen quantitative trait  
76 loci (QTLs) associated with body weight, as a proxy for body size, have been identified (5,8,14–  
77 22), as well as associations for other morphological phenotypes such as ear flop (5,15,16) and fur  
78 type (8,23,24). Despite the success of morphological trait mapping, we suggest that imputation  
79 can improve the power of GWAS, especially for reducing large intervals for use in fine-mapping.  
80 We posit that improving the density of variants by using an imputation panel will greatly improve  
81 the power to identify causal loci for canine complex traits, due to increased LD. We use 365  
82 canine whole genome sequences to create a reference panel of 24 million variants and impute  
83 these variants in 6,112 dogs previously genotyped on a semi-custom 185k CanineHD array. We

84 show that using an imputation panel increases our power to detect variants affecting complex  
85 canine traits – both morphological and blood phenotypes – by identifying novel loci, and by  
86 refining intervals for previously-identified QTL's for use in fine-mapping. To our knowledge, this is  
87 the first study to use an imputation panel based on WGS for canine mapping studies.

88

## 89 **Results:**

### 90 Evaluation of imputation accuracy

91 We used IMPUTE2 to impute the WGS reference panel across the 6,112 genotyped dogs  
92 resulting in 24 million variants. By comparing 33,144 imputed variants to directly genotyped sites  
93 on a second custom array, we were able to calculate the accuracy for our imputation panel, which  
94 was 88.4% overall. Across all sites, purebred dogs had the highest accuracy (89.7%, n=276),  
95 followed by mixed-breed dogs (88.6%, n=13), and then village dogs (84.2%, n=86). This result is  
96 expected given that 210 of our 365 WGS panel were purebred dogs, and also due to the long-  
97 range haplotypes found in purebreds that make calling imputed variants easier. For all three dog  
98 types (purebred, mixed-breed, and village), imputation accuracy increased with decreasing minor  
99 allele frequency (MAF) (Fig. 1a), which is an expected result because as MAF decreases, the  
100 occurrence of the major allele is the correct call more often. Looking at true heterozygous sites  
101 only (Fig. 1b), imputation accuracy was lower across all MAFs compared to all sites (Fig. 1a).  
102 Imputation accuracy increased as MAF increased for heterozygous sites, as there are more  
103 heterozygous calls for SNPs with higher MAF.

104 In general, the larger chromosomes and chromosome X had higher imputation accuracies than  
105 the smaller chromosomes, such as 35, 36, 37, and 38, due to lower recombination rates (S1  
106 Table). For all purebred, mixed-breed, and village dogs, the average imputation accuracy per  
107 chromosome was 89.1% (range of 84.3-93.5%), 88.0% (range of 83.0-93.0%), and 83.7% (range  
108 of 78.5-92.4%), respectively.

109

### 110 Body size associations

111 We performed two separate GWAS, firstly using the semi-custom CanineHD array data of 185k  
112 markers, and secondly using our imputed panel of 24 million variants. The phenotypes used in  
113 these GWAS were male breed-average weight<sup>0.303</sup>, male breed-average height, and individual  
114 sex-corrected weight<sup>0.303</sup>. We were then able to compare the results from the array GWAS and  
115 the imputed GWAS using the exact same phenotypes.

116 Using imputed data generally increased the significance of body size associations seen in the  
117 array data, especially *HMGA2* on CFA10 and *fgf4* on CFA18 for height (Fig 2a,b,c; S2 Table).  
118 Most of the respective QTLs from the array GWAS and the imputed GWAS were in LD ( $r^2 > 0.2$ )  
119 with the exception of the CFA12 and two CFA26 associations (Table 1). When imputed variants  
120 were not in high LD ( $r^2 < 0.8$ ) with array QTLs, the imputed variants generally had stronger effect  
121 sizes and lower minor allele frequencies (Table 1).

122 For most size-associated variants, the breed-average weight and height effects were roughly  
123 isometric, with the exception of CFA18 and CFA12 QTLs, which had a greater effect on height  
124 than weight (Fig. 2d). Of the seventeen autosomal QTLs that have been previously associated  
125 with body size (5,8,14–22,25), only one (CFA3:62) did not reach significance using the imputed  
126 panel (significance threshold of  $P = 1 \times 10^{-8}$ ), with  $P$ -values of  $1.1 \times 10^{-5}$ ,  $2.1 \times 10^{-7}$  and  $1.8 \times 10^{-8}$  for  
127 individual weight, breed-average weight and breed-average height respectively (S2 Table).

128 GWAS of breed-average weight provided the most power on average, so we will focus on that  
129 phenotype for the rest of the body size analyses.

130 We used the identified body size QTLs to predict the body weight of individuals, by randomly  
131 setting 20% of the body weights in the dataset to missing, then using a Bayesian sparse linear  
132 mixed model to predict the missing weights, and finally comparing the predicted weights to the  
133 actual weights. Using the 20 QTLs identified from the array GWAS (see bold in Table 1), we  
134 found a correlation coefficient ( $r$ ) of 0.851. Using the 20 QTLs from the imputed GWAS (see bold  
135 in Table 1), we found  $r$  of 0.869, and this increased very slightly to 0.870 when two more QTLs  
136 were included (see italics in Table 1).

137 Table 1: Positions, minor allele frequencies (MAF), and effect sizes for SNPs associated with  
 138 breed-average male weight<sup>0.303</sup> using the array data and imputed data, and LD between these  
 139 pairs of SNPs.

| Chr | Array<br>Position | Array<br>MAF | Array<br>Effect size | Imputation<br>Position | Imputation<br>MAF | Imputation<br>Effect size | LD<br>(r <sup>2</sup> ) |
|-----|-------------------|--------------|----------------------|------------------------|-------------------|---------------------------|-------------------------|
| 1   | <b>55983871</b>   | 0.129        | -0.071               | <b>55922563</b>        | 0.127             | -0.077                    | 0.874                   |
| 3   | <b>41758863</b>   | 0.311        | -0.031               | <b>41780841</b>        | 0.111             | -0.074                    | 0.246                   |
| 3   | <b>62042184</b>   | 0.100        | 0.062                | 61887587               | 0.093             | 0.065                     | 0.849                   |
| 3   | <b>91103945</b>   | 0.227        | 0.067                | <b>91110878</b>        | 0.283             | 0.094                     | 0.433                   |
|     | 91103945          |              |                      | <i>91138480</i>        | 0.237             | 0.045                     | 0.088                   |
| 4   | <b>39112085</b>   | 0.334        | -0.052               | <b>39182836</b>        | 0.262             | -0.060                    | 0.396                   |
| 4   | <b>67026055</b>   | 0.404        | -0.033               | <b>67040898</b>        | 0.363             | -0.074                    | 0.382                   |
| 5   | <b>31895829</b>   | 0.461        | -0.029               | <b>31689208</b>        | 0.248             | -0.045                    | 0.265                   |
| 7   | <b>30243851</b>   | 0.271        | -0.044               | <b>30183217</b>        | 0.176             | -0.067                    | 0.518                   |
| 7   | <b>41392649</b>   | 0.356        | -0.041               | <b>41351722</b>        | 0.349             | -0.044                    | 0.903                   |
| 7   | <b>43719549</b>   | 0.382        | -0.067               | <b>43724293</b>        | 0.356             | -0.076                    | 0.894                   |
| 9   | N/A               |              |                      | <b>12034947</b>        | 0.054             | -0.094                    | N/A                     |
| 10  | <b>8183593</b>    | 0.209        | -0.135               | <b>8379634</b>         | 0.249             | -0.191                    | 0.557                   |
|     | 8183593           |              |                      | <i>8100754</i>         | 0.194             | -0.079                    | 0.851                   |
| 11  | <b>26929946</b>   | 0.243        | -0.045               | <b>26929946</b>        | 0.243             | -0.045                    | 1.000                   |
| 12  | <b>33733595</b>   | 0.435        | 0.026                | 33712492               | 0.161             | 0.067                     | 0.148                   |
| 15  | <b>41221438</b>   | 0.465        | -0.115               | <b>41216098</b>        | 0.464             | -0.114                    | 0.979                   |
| 18  | <b>20272961</b>   | 0.151        | -0.083               | <b>20379945</b>        | 0.161             | -0.116                    | 0.577                   |
| 20  | <b>21479863</b>   | 0.085        | 0.056                | <b>21686712</b>        | 0.110             | 0.072                     | 0.493                   |
| 26  | <b>7631562</b>    | 0.340        | 0.031                | <b>7679257</b>         | 0.175             | 0.059                     | 0.075                   |
| 26  | <b>13224865</b>   | 0.307        | -0.042               | <b>12838979</b>        | 0.232             | -0.078                    | 0.154                   |
| 32  | N/A               |              |                      | <b>5228269</b>         | 0.164             | -0.077                    | N/A                     |
| 34  | <b>18559537</b>   | 0.237        | -0.050               | <b>18587956</b>        | 0.258             | -0.051                    | 0.849                   |
| 39  | <b>102212242</b>  | 0.345        | 0.073                | <b>102209680</b>       | 0.342             | 0.075                     | 0.983                   |

140 20 array QTLs and 20 imputed QTLs (shown in bold) were used in a prediction model and then  
 141 another 2 imputed QTLs (shown in italics) were added to the prediction model (see text).

142

143 Known body size loci

144 Nine body size QTLs have previously been fine-mapped (*IGF1R*, *STC2*, *GHR*, *SMAD2*, *HMGA2*,  
145 *FGF4*, *IGF1*, *fgf4*, *IGSF1*) (17–20,25,26). For each of these, the region in LD with the most  
146 significant respective marker in the breed-average weight imputed GWAS contained the known or  
147 putative causal variant (S1 Fig.). While the putative causal variants weren't always the highest  
148 associated variant at a locus, they generally had *P*-values within two orders of magnitude of the  
149 most associated marker (S1 Fig.), confirming that the imputation panel performs well for the  
150 weight GWAS.

151 Unsurprisingly, many of the putative causal variants are not markers on the CanineHD array,  
152 including *IGF1R* (3:41,849,479) (20), *STC2* (4:39,182,836), *GHR* (4:67,040,898 and  
153 4:67,040,939), and *HMGA2* (10:8,348,804) (17). With the array data, the *IGF1R* QTL ( $P = 1.4 \times 10^{-5}$   
154 for breed-average weight GWAS) did not reach significance, but with the imputed data we saw a  
155 significant association signal ( $P = 1.6 \times 10^{-12}$  for breed-average weight GWAS), and the causal  
156 variant was the 6<sup>th</sup> most associated SNP ( $r^2 = 0.73$  between causal and associated SNP) (S1 Fig.  
157 a). The *STC2* and *GHR* (4:67,040,898) putative causal variants were the most significant variants  
158 at those loci in the imputed GWAS (S1 Fig. b,c). Note that there are two putative causal variants  
159 for *GHR* (17), both in exon 5, but only one passed our 5% MAF filter. Similarly, the *HMGA2*  
160 causal variant was in high LD ( $r^2=0.91$ ) with the most significant marker at this locus in the  
161 imputed GWAS (S1 Fig. e).

162 For *IGF1*, SNP5 (BICF2P971192, 15:41,221,438), which is in LD with the SINE element (18), was  
163 the most significant association in the array GWAS. In the imputed GWAS, SNP5 was the 2<sup>nd</sup>  
164 most associated SNP and the SNP that tags the SINE element (15:41,220,982) was the 4<sup>th</sup> most  
165 associated SNP, and these SNPs were nearly in complete LD with the most significant marker in  
166 the GWAS ( $r^2=0.98$  and  $0.97$  respectively) (S1 Fig. f). The *IGSF1* missense mutation (26) was in  
167 high LD with the most significant association in the imputed GWAS ( $r^2=0.97$ ) (S1 Fig. i). Note that  
168 there is a second variant in *IGSF1* – an in-frame deletion – that has also been identified (26).

169

170 Imputed GWAS novel body size loci

171 We previously identified four novel QTLs, making a total of seventeen, that are associated with  
172 body size in dogs (8). Here, using the imputation data, we found a further five novel QTLs  
173 (CFA5:31, CFA7:41, CFA9:12, CFA26:7, CFA32:5) that passed our significance threshold in a  
174 breed-average weight GWAS. As a conservative control, we performed a further breed-average  
175 weight GWAS in which we included the four most-associated QTLs (CFA10:8, CFA15:41,  
176 CFA3:91, CFA7:43) as covariates. The results showed that the novel loci at CFA5:31, CFA7:41  
177 and CFA32:5 were no longer significant – and four other loci were also not significant in the  
178 covariate GWAS: CFA1:56, CFA11:26, CFA20:21, CFA34:18. Further analyses are required to  
179 determine if these are true or spurious associations, but since we cannot rule out that they are  
180 spurious, we conclude that we have identified only two novel canine body size QTLs, at CFA9:12  
181 and CFA26:7.

182 The most significant SNP at CFA9:12 is located about 200kb upstream of the gene *growth*  
183 *hormone 1 (GH1)* (Fig. 3a), which is expressed in the pituitary and has been associated with body  
184 size in humans and cattle (27–29). The non-reference, derived indel that was the most highly  
185 associated in our imputed GWAS is found at high frequency in two small breeds Papillon and  
186 Pomeranian, and also in New Guinea Singing Dogs. Using our snpEff annotated variant files, we  
187 found two variants in *GH1*: a splice donor variant in intron 3 (CFA9:11,833,343,  
188 c.288+2\_288+3insT), and an in-frame deletion in exon 5 (CFA9:11,832,437,  
189 c.573\_578delGAAAGA, p.Lys191\_Asp). Both of these variants were at <5% frequency in the  
190 WGS panel but all occurrences were in small-sized breeds (such as Yorkshire terrier and  
191 Maltese).

192 The second novel body size QTL is at CFA26:7 (Fig. 3b). Investigation of the surrounding region  
193 uncovered a couple of potential candidate genes. The first is *ANAPC5*, a member of the  
194 anaphase-promoting complex gene family that includes *ANAPC13*, which has been associated  
195 with height in humans (30). The second candidate gene is the histone H3 demethylase *KDM2B*  
196 (*lysine-specific demethylase 2B*), which has been associated with body mass index in humans in  
197 a CpG methylation study (31). However, we did not identify any variants in *ANAPC5* or *KDM2B* in



198 the snpEff-annotated files that are in LD with the associated imputation variant. The non-  
199 reference, derived allele was found at high frequency in the small breeds Shiba Inu, Havanese,  
200 and Chihuahua.

201

#### 202 Refinement of body size loci

203 With the imputation panel, we saw a refinement in several QTL regions – for example, the  
204 chromosome 3 association near the genes *LCORL* and *ANAPC13*, both of which have previously  
205 been associated with body size (5,15,29,30,32). Using imputed data, this QTL had a more  
206 significant and defined association, compared to the CanineHD array data alone (S2 Fig. a). The  
207 QTL interval is about 65kb and 60kb upstream of the genes *LCORL* and *ANAPC13* respectively,  
208 suggesting the causal variant is likely regulatory. Another example is the recently identified body  
209 size QTL at CFA7:30 Mb, near the gene *TBX19* (8). Here the imputed GWAS results showed a  
210 narrower QTL interval of greater significance when compared to the array GWAS (S2 Fig. b). This  
211 region overlaps *TBX19* but we did not observe any coding loci in our snpEff annotated variant  
212 files that are in LD with the most associated SNP.

213

#### 214 Allelic heterogeneity

215 In order to reduce phenotypic noise, again we included the four most-associated QTLs (CFA10:8,  
216 CFA15:41, CFA3:91, CFA7:43) as covariates in the GWAS (hereafter referred to as “top 4  
217 covariates”), and then implemented a region-specific stepwise approach, including further  
218 associated SNPs in the region as covariates, until no significant association signal remained. For  
219 breed-average body weight, when we regressed out the most significant association for a QTL,  
220 we expected the association signal to disappear, as seen with the *SMAD2* QTL (Fig. 4a).  
221 Our results showed two QTLs (CFA3:91, CFA10:8) that retain significant association signal after  
222 regressing out the most associated locus in the respective region (Fig. 4b,c). For both CFA3 and  
223 CFA10, the data suggest there may be two independent significant associations in these regions.  
224 In the CFA3 region, the initial association signal peak looked regulatory while the residual signal  
225 is located in the genes *ANAPC13* and *LCORL*. The residual signal in the CFA10 region lies close

226 to the ear flop association (5,15,16) (candidate gene *MSRB3*) but is not in LD with the imputed  
227 ear flop locus at CFA10: 8,097,650 ( $r^2=0.147$ ). The variant in this residual signal region may be  
228 regulatory, as the significance peak lies approximately 248kb upstream of *HMG2*. We did not  
229 identify any coding variants in these two residual signal regions from the snpEff annotations. Two  
230 other QTLs (CFA4:67 and CFA15:41) showed evidence of residual signal but these did not reach  
231 significance ( $P = 2.9 \times 10^{-7}$  and  $2.9 \times 10^{-8}$ , respectively).

232 This residual signal suggested allelic heterogeneity in these regions but could also be due to  
233 imperfect tagging in the imputed dataset. As a follow-up analysis, for each of these two QTLs  
234 (CFA3:91 and CFA10:8), we took the most significant SNP from the top 4 covariates GWAS. We  
235 used that significant SNP as a covariate in a GWAS to see if we were able to recover the most  
236 significant SNP from the initial GWAS with no covariates. For both CFA3 and CFA10, we did  
237 recover the initial associated SNP, suggesting that these are real associations and not midway  
238 between two imperfectly tagged SNPs.

239

#### 240 Blood phenotypes

241 Using our imputed panel for GWAS on blood phenotypes revealed several novel associations.  
242 For example, we saw significant associations with the phenotypes of albumin and calcium levels  
243 in peripheral blood ( $P = 4.5 \times 10^{-10}$  and  $5.9 \times 10^{-9}$  respectively), neither of which were previously  
244 identified in the array GWAS (33) (S3 Table). We also identified a novel association with blood  
245 glucose level and CFA1, located in the gene solute carrier family 22 member 1 (*SLC22A1*) and  
246 about 30kb downstream of the insulin-like growth factor 2 receptor gene (*CI-MPR/IGF2R*) (Fig.  
247 5d). During gestation, *IGF2R* binds insulin-like growth factor 2 (IGF2), the presence of which  
248 stimulates the uptake of glucose (34). The SNP was at highest frequency (>50%) in the Samoyed  
249 and American Eskimo dog breeds.

250 Of the eight significant associations (using a threshold of  $P = 1.0 \times 10^{-8}$ ) we saw with the imputed  
251 data, only two were not novel – alanine aminotransferase (ALT) and amylase – although both  
252 increased in significance (Fig. 5g, 5h; S3 Table). In addition to significant associations, we also

253 saw six associations that nearly meet our significance threshold, that is,  $P < 2.0 \times 10^{-8}$ , including  
254 three that were not significant using the genotype data (S3 Table).

255

256 **Discussion:**

257 Imputation increases GWAS power by including additional sites that are not well-tagged by any  
258 single array marker, and has been successfully implemented in human studies, for example, low-  
259 density lipoprotein GWAS (35–37). Here we present a canine imputation panel of 24 million  
260 variants – an approximate 130-fold increase in SNP number and SNP density from the semi-  
261 custom CanineHD array – for use in association studies. This panel has an overall accuracy rate  
262 of 88.4% when compared to genotype data from the same individuals (276 purebreds, 86 village  
263 dogs, and 13 mixed-breed dogs). In the future, panels based on even larger numbers of  
264 sequenced individuals would yield even higher accuracy (for example, see (38)), but this panel  
265 based on hundreds of dogs is still a useful, cost-effective way to improve the power of canine  
266 mapping studies today.

267 With our imputation panel, we improved association mapping for previously studied phenotypes,  
268 such as body size. Previous mapping studies of canine body size and other morphological traits  
269 using CanineHD array data have identified many significant QTLs. This success is largely the  
270 result of selection for body size during the formation of dog breeds, leading to selective sweeps  
271 around large-effect loci that facilitated mapping efforts. Nevertheless, using the imputation panel,  
272 we were able to identify two additional novel loci (at CFA9:12 and CFA26:7) that influence body  
273 size although functional studies, which are beyond the scope of this research study, are required  
274 to validate these two loci. Using imputation, we were also able to narrow intervals for previously  
275 known associated QTLs, and find evidence of possible allelic heterogeneity at two loci.  
276 Furthermore, imputation provides a more accurate analysis of the genetic architecture underlying  
277 canine body size and, in turn, allows a more accurate prediction for body size in dogs.  
278 Imputation is especially helpful in across-breed and/or mixed-breed study designs, where LD  
279 breaks down very rapidly making it more difficult to identify associations. Increasing the number  
280 and density of queried variants (as done by imputation) increases the chance that a variant will be

281 in LD with the causal variant, especially when compared to a within-breed study design. We used  
282 our imputation panel for across-breed GWAS of blood phenotypes, resulting in several novel  
283 associations and the narrowing of associated intervals when compared to array data alone.  
284 Although costs of WGS are decreasing, it is still more cost-effective to use a panel of WGS  
285 individuals to create an imputation dataset based on genotyped samples than it is to directly  
286 WGS all the samples (39). Our imputation panel was created using over 350 canine WGS's  
287 representing 76 breeds. The inclusion of more breeds, especially diverse breeds (such as the  
288 Parson Russell Terrier) and rare breeds (such as the Pumi), will improve the accuracy of, and the  
289 number of rare variants in, future imputation panels. A recent canine imputation study has shown  
290 that imputation accuracy is highest using a multi-breed reference panel (compared to a breed-  
291 specific panel), and when there is overlap in breeds between the target and reference panel (40).  
292 Furthermore, human studies have shown that imputation accuracy increases with the size of the  
293 reference panel (41,42).

294 In summary, using our canine imputation panel of 24 million variants results in an increase in  
295 GWAS power, even for phenotypes that have multiple significant associations. The improvements  
296 to canine GWAS, especially for complex phenotypes, will not only further the field of canine  
297 genetics, but may also have beneficial implications for human medical genetics – especially for  
298 complex diseases, such as cancer, for which the domestic dog is a good model organism (43).

299

## 300 **Material and Methods:**

### 301 Whole genome sequences

302 The 365 whole genome sequences include 210 breed dogs (from 76 breeds), 107 village dogs  
303 (from 13 countries), and 28 wolves (S4 Table). 88 of these were sequenced at the Cornell  
304 University BRC Genomics Facility; others were sourced from public databases (S4 Table). Those  
305 sequenced at Cornell were run on an Illumina HiSeq2000 or Illumina HiSeq2500 and the reads  
306 were aligned to the CanFam3.1 reference genome using BWA (44). Variants were called using  
307 GATK's HaplotypeCaller (46–48). Variant quality recalibration was done in GATK using the semi-  
308 custom canineHD variant sites (8) as a training set (known=false, training=true, truth=true,

309 prior=12.0). We included SNPs in the 99.9% tranche and removed sites with minor allele  
310 frequency (MAF) less than 0.5%. Phasing was done using Beagle r1399 (45).

311

### 312 Imputation panel

313 SHAPEIT v2.r790(49) was used to phase the genotype data from 6,112 dogs as previously  
314 described (8) and then IMPUTE2 version 2.3.0 (50) was used to impute across these data.  
315 Imputation was only performed on the autosomes and chromosome X, not on the Y chromosome  
316 or mitochondrial SNPs. The final reference panel consists of 24.0 million variants, including  
317 750,000 on the X chromosome, of which 20.33 million are SNPs and 3.67 million are indels.

318

### 319 Imputation Accuracy

320 276 purebred, 86 village, and 13 mixed-breed dogs were also genotyped on a second custom  
321 Illumina CanineHD 215k array, which contains 33,144 SNPs that are not on the 185k semi-  
322 custom CanineHD array but do feature in our imputed dataset. These 33,144 SNPs were used to  
323 determine the accuracy of our imputation across the 375 total dogs. Accuracy was calculated for  
324 each SNP as the number of sites that are correctly called in the imputed dataset divided by the  
325 total number of dogs. For example, if a G/C SNP was called G/G in 14 dogs, C/C in 10 dogs, and  
326 G/C in the remaining 351 dogs, then the imputation accuracy for that SNP is 93.6%. MAF was  
327 calculated for each SNP as the number of occurrences of the allele across all village, purebred,  
328 and mixed-breed dogs in the genotyped dataset. Imputation accuracy and MAF were plotted in  
329 Jupyter notebook (51) using Matplotlib library (52).

330

### 331 Marker Datasets

332 For the genotype data, individuals were run on a semi-custom Illumina CanineHD array of 185k  
333 SNPs, and quality control steps were performed as previously described(8). For the imputed data,  
334 IMPUTE2 outputs were converted into PLINK (53) binary format, one for each chromosome.

335

### 336 GWAS

337 We ran GWAS using a linear mixed model in the program GEMMA v 0.94 (54), with a MAF cut-off  
338 of 5% and using the Wald test to determine  $P$ -values. All LD plots were created using Matplotlib  
339 library (52) in Jupyter notebook (51).

340 For the imputed panel, GWAS was performed for each canine chromosome (CFA1-39)  
341 separately. The kinship matrix calculated using the array data in GEMMA was also used in the  
342 imputed GWAS for the same phenotype. The significance threshold was set to  $P = 1 \times 10^{-8}$  (see  
343 (55)).

#### 344 1. Body size

345 To identify QTLs associated with body size, we ran a GWAS of breed-average body weights  
346 ( $n=1926$ ) and heights ( $n=1926$ ), and individual body weights ( $n=3095$ ), using both the semi-  
347 custom 185k CanineHD array data and the imputed panel data. Effect sizes were recorded from  
348 the GEMMA output, and MAF's and LD statistics were calculated using PLINK.

#### 349 *Breed-average body size*

350 The breed-average data included dogs from 175 breeds with a maximum of 25 dogs per breed.  
351 The phenotypes of male breed-average weight<sup>0.303</sup> in kg, or male breed-average height in cm,  
352 were assigned to all dogs in the breed for the weight and height GWAS, respectively. We used  
353 weight<sup>0.303</sup> to normalize the distribution of weights across the breeds, based on a Box-Cox  
354 transformation performed in R (56) using the package MASS (57).

#### 355 *Individual body weights*

356 Individual body weight GWAS was performed using 3,095 dogs including 417 village dogs and  
357 427 mixed-breed dogs. The average raw weight in this individual dataset is 24.7kg, ranging from  
358 1.6kg to 99.7kg. 164 breeds are represented, with 52 small breeds, 57 medium breeds, 34 large,  
359 and 21 giant breeds. Individual weights were sex-corrected by 16.47% (that is, female weights  
360 were increased by 16.47%), and transformed (weight<sup>0.303</sup>).

#### 361 *Covariate GWAS*

362 GWAS of breed-average body weight using imputed variants shows the four most-associated loci  
363 are *HMGA2* (CFA10), *IGF1* (CFA15), *LCORL* (CFA3), and *SMAD2* (CFA7). In order to control for  
364 possible spurious associations, we ran an imputed GWAS, using breed-average body weights,

365 including the four most-associated loci as covariates and then observed which of our significant  
366 associations remained.

### 367 *Fine mapping*

368 We used snpEff version 4.3T (58) to annotate our WGS variant file, using the pre-built  
369 CanFam3.1.86 database, and then used this to search for potential causal variants within specific  
370 LD regions.

### 371 *Predicting body size*

372 We used all the individual body weights (n=3,095) and specific body size QTLs as a training set,  
373 and then randomly set 20% of the weights to missing and used a Bayesian sparse linear mixed  
374 model (with a ridge regression/GBLUP fit) in GEMMA to predict these missing weights. We did  
375 this randomization and prediction 50 times, and then compared the actual weights to the  
376 predicted weights using a correlation coefficient.

### 377 *Allelic heterogeneity*

378 In order to reduce phenotypic noise, we again included all four most-associated QTLs as  
379 covariates in a follow-up GWAS of breed-average body weight and then, for those regions that  
380 still had residual association signal, we also included the most associated SNP (in addition to the  
381 four) as a covariate in the next GWAS. We continued this stepwise process of including the most-  
382 associated SNP in the next GWAS until there was no significant association signal in the  
383 respective region remaining. The same analysis was run using the three most-associated loci  
384 (*HMGA2*, *IGF1*, *LCORL*) and the five most-associated loci (*HMGA2*, *IGF1*, *LCORL*, *SMAD2*,  
385 *GHR*) with comparable results (data not shown).

## 386 2. Blood phenotypes

387 Using previously published data of 38 phenotypes from complete blood count (CBC) and serum  
388 chemistry diagnostic panels (33), GWAS were performed using the imputed data and results  
389 were compared to the published results using the semi-custom CanineHD array data.

390

### 391 Data Availability

392 Whole-genome sequence data produced for this research have been deposited in the Sequence  
393 Read Archive (<http://www.ncbi.nlm.nih.gov/sra>) with accession numbers listed in S4 Table.  
394 The pre-phased genotype data (binary PLINK files) and the phased WGS data (vcf files) are  
395 publicly available at datadryad.org (doi:10.5061/dryad.jk9504s).

396

397 **Acknowledgments:**

398 The authors would like to acknowledge Liz Corey and other Cornell Veterinary Biobank  
399 personnel, Peter Schweitzer at the Cornell University Genomics Facility, and the many dog  
400 owners that contributed samples.

401

402 **Author Contributions:**

403 Investigation: JJH, ARB

404 Formal analysis: MB, LMS

405 Resources: MEW, MLC, MGC, SAC, VM-W, KWS, NBS, RJT

406 Writing – original draft preparation: JJH, ARB

407 Writing – review and editing: JJH, MEW, MB, LMS, MLC, MGC, SAC, VM-W, KWS, NBS, RJT,

408 ARB

409

410 **Competing financial interests:**

411 ARB is the chief scientific officer of Embark Veterinary Inc.

412

413 **References**

414 1. Asher L, Diesel G, Summers JF, McGreevy PD, Collins LM. Inherited defects in pedigree  
415 dogs. Part 1: Disorders related to breed standards. *Vet J.* 2009 Dec;182(3):402–11.

416 2. Lindblad-Toh K, Wade CM, Mikkelsen TS, Karlsson EK, Jaffe DB, Kamal M, et al. Genome  
417 sequence, comparative analysis and haplotype structure of the domestic dog. *Nature.* 2005  
418 Dec 8;438(7069):803–19.



- 419 3. Hoepfner MP, Lundquist A, Pirun M, Meadows JRS, Zamani N, Johnson J, et al. An  
420 Improved Canine Genome and a Comprehensive Catalogue of Coding Genes and Non-  
421 Coding Transcripts. PLOS ONE. 2014 Mar 13;9(3):e91172.
- 422 4. Kirkness EF, Bafna V, Halpern AL, Levy S, Remington K, Rusch DB, et al. The Dog Genome:  
423 Survey Sequencing and Comparative Analysis. Science. 2003 Sep 26;301(5641):1898–  
424 903.
- 425 5. Vaysse A, Ratnakumar A, Derrien T, Axelsson E, Pielberg GR, Sigurdsson S, et al.  
426 Identification of Genomic Regions Associated with Phenotypic Variation between Dog  
427 Breeds using Selection Mapping. PLOS Genet. 2011 Oct 13;7(10):e1002316.
- 428 6. Wolf ZT, Brand HA, Shaffer JR, Leslie EJ, Arzi B, Willet CE, et al. Genome-Wide Association  
429 Studies in Dogs and Humans Identify ADAMTS20 as a Risk Variant for Cleft Lip and Palate.  
430 PLOS Genet. 2015 Mar 23;11(3):e1005059.
- 431 7. Tengvall K, Kierczak M, Bergvall K, Olsson M, Frankowiack M, Farias FHG, et al. Genome-  
432 Wide Analysis in German Shepherd Dogs Reveals Association of a Locus on CFA 27 with  
433 Atopic Dermatitis. PLOS Genet. 2013 May 9;9(5):e1003475.
- 434 8. Hayward JJ, Castelhana MG, Oliveira KC, Corey E, Balkman C, Baxter TL, et al. Complex  
435 disease and phenotype mapping in the domestic dog. Nat Commun. 2016 Jan 22;7:10460.
- 436 9. Mogensen MS, Karlskov-Mortensen P, Proschowsky HF, Lingaas F, Lappalainen A, Lohi H,  
437 et al. Genome-Wide Association Study in Dachshund: Identification of a Major Locus  
438 Affecting Intervertebral Disc Calcification. J Hered. 2011 Sep 1;102(Suppl\_1):S81–6.
- 439 10. Quilez J, Martínez V, Woolliams JA, Sanchez A, Pong-Wong R, Kennedy LJ, et al. Genetic  
440 Control of Canine Leishmaniasis: Genome-Wide Association Study and Genomic Selection  
441 Analysis. PLOS ONE. 2012 Apr 25;7(4):e35349.

- 442 11. Daetwyler HD, Capitan A, Pausch H, Stothard P, van Binsbergen R, Brøndum RF, et al.  
443 Whole-genome sequencing of 234 bulls facilitates mapping of monogenic and complex  
444 traits in cattle. *Nat Genet.* 2014 Aug;46(8):858–65.
- 445 12. The 1000 Genomes Project Consortium. A global reference for human genetic variation.  
446 *Nature.* 2015 Oct 1;526(7571):68–74.
- 447 13. Karlsson EK, Lindblad-Toh K. Leader of the pack: gene mapping in dogs and other model  
448 organisms. *Nat Rev Genet.* 2008 Sep;9(9):713–25.
- 449 14. Eigenmann JE, Patterson DF, Froesch ER. Body size parallels insulin-like growth factor I  
450 levels but not growth hormone secretory capacity. *Acta Endocrinol (Copenh).* 1984  
451 Aug;106(4):448–53.
- 452 15. Boyko AR, Quignon P, Li L, Schoenebeck JJ, Degenhardt JD, Lohmueller KE, et al. A Simple  
453 Genetic Architecture Underlies Morphological Variation in Dogs. *PLOS Biol.* 2010 Aug  
454 10;8(8):e1000451.
- 455 16. Jones P, Chase K, Martin A, Davern P, Ostrander EA, Lark KG. Single-Nucleotide-  
456 Polymorphism-Based Association Mapping of Dog Stereotypes. *Genetics.* 2008  
457 Jun;179(2):1033–44.
- 458 17. Rimbault M, Beale HC, Schoenebeck JJ, Hoopes BC, Allen JJ, Kilroy-Glynn P, et al. Derived  
459 variants at six genes explain nearly half of size reduction in dog breeds. *Genome Res.* 2013  
460 Dec;23(12):1985–95.
- 461 18. Sutter NB, Bustamante CD, Chase K, Gray MM, Zhao K, Zhu L, et al. A single IGF1 allele is  
462 a major determinant of small size in dogs. *Science.* 2007 Apr 6;316(5821):112–5.
- 463 19. Parker HG, VonHoldt BM, Quignon P, Margulies EH, Shao S, Mosher DS, et al. An  
464 Expressed Fgf4 Retrogene Is Associated with Breed-Defining Chondrodysplasia in  
465 Domestic Dogs. *Science.* 2009 Aug 21;325(5943):995–8.

- 466 20. Hoopes BC, Rimbault M, Liebers D, Ostrander EA, Sutter NB. The insulin-like growth factor 1  
467 receptor (IGF1R) contributes to reduced size in dogs. *Mamm Genome Off J Int Mamm*  
468 *Genome Soc.* 2012 Dec;23(11–12):780–90.
- 469 21. Chase K, Carrier DR, Adler FR, Jarvik T, Ostrander EA, Lorentzen TD, et al. Genetic basis  
470 for systems of skeletal quantitative traits: Principal component analysis of the canid  
471 skeleton. *Proc Natl Acad Sci.* 2002 Jul 23;99(15):9930–5.
- 472 22. Quignon P, Schoenebeck JJ, Chase K, Parker HG, Mosher DS, Johnson GS, et al. Fine  
473 Mapping a Locus Controlling Leg Morphology in the Domestic Dog. *Cold Spring Harb Symp*  
474 *Quant Biol.* 2009 Jan 1;74:327–33.
- 475 23. Drögemüller C, Karlsson EK, Hytönen MK, Perloski M, Dolf G, Sainio K, et al. A mutation in  
476 hairless dogs implicates FOXI3 in ectodermal development. *Science.* 2008 Sep  
477 12;321(5895):1462.
- 478 24. Cadieu E, Neff MW, Quignon P, Walsh K, Chase K, Parker HG, et al. Coat Variation in the  
479 Domestic Dog Is Governed by Variants in Three Genes. *Science.* 2009 Oct  
480 2;326(5949):150–3.
- 481 25. Brown EA, Dickinson PJ, Mansour T, Sturges BK, Aguilar M, Young AE, et al. FGF4  
482 retrogene on CFA12 is responsible for chondrodystrophy and intervertebral disc disease in  
483 dogs. *Proc Natl Acad Sci.* 2017 Oct 24;114(43):11476–81.
- 484 26. Plassais J, Rimbault M, Williams FJ, Davis BW, Schoenebeck JJ, Ostrander EA. Analysis of  
485 large versus small dogs reveals three genes on the canine X chromosome associated with  
486 body weight, muscling and back fat thickness. *PLOS Genet.* 2017 Mar 3;13(3):e1006661.
- 487 27. Millar DS, Lewis MD, Horan M, Newsway V, Easter TE, Gregory JW, et al. Novel mutations  
488 of the growth hormone 1 (GH1) gene disclosed by modulation of the clinical selection  
489 criteria for individuals with short stature. *Hum Mutat.* 2003 Apr;21(4):424–40.

- 490 28. Mullen MP, Berry DP, Howard DJ, Diskin MG, Lynch CO, Berkowicz EW, et al. Associations  
491 between novel single nucleotide polymorphisms in the *Bos taurus* growth hormone gene  
492 and performance traits in Holstein-Friesian dairy cattle. *J Dairy Sci.* 2010 Dec;93(12):5959–  
493 69.
- 494 29. Lango Allen H, Estrada K, Lettre G, Berndt SI, Weedon MN, Rivadeneira F, et al. Hundreds  
495 of variants clustered in genomic loci and biological pathways affect human height. *Nature.*  
496 2010 Oct 14;467(7317):832–8.
- 497 30. Weedon MN, Lango H, Lindgren CM, Wallace C, Evans DM, Mangino M, et al. Genome-wide  
498 association analysis identifies 20 loci that influence adult height. *Nat Genet.* 2008  
499 May;40(5):575–83.
- 500 31. Demerath EW, Guan W, Grove ML, Aslibekyan S, Mendelson M, Zhou Y-H, et al.  
501 Epigenome-wide association study (EWAS) of BMI, BMI change and waist circumference in  
502 African American adults identifies multiple replicated loci. *Hum Mol Genet.* 2015 Aug  
503 1;24(15):4464–79.
- 504 32. Jiang BJ, Zhan XL, Fu CZ, Wang HB, Cheng G, Zan LS. Identification of ANAPC13 gene  
505 polymorphisms associated with body measurement traits in *Bos taurus*. *Genet Mol Res.*  
506 2012;11(3):2862–70.
- 507 33. White ME, Hayward JJ, Stokol T, Boyko AR. Genetic Mapping of Novel Loci Affecting Canine  
508 Blood Phenotypes. *PLOS ONE.* 2015 Dec 18;10(12):e0145199.
- 509 34. Cianfarani S. Insulin-like growth factor-II: new roles for an old actor. *Front Endocrinol*  
510 [Internet]. 2012 Oct 2 [cited 2018 Nov 5];3. Available from:  
511 <https://www.ncbi.nlm.nih.gov/pmc/articles/PMC3462314/>
- 512 35. Willer CJ, Sanna S, Jackson AU, Scuteri A, Bonnycastle LL, Clarke R, et al. Newly identified  
513 loci that influence lipid concentrations and risk of coronary artery disease. *Nat Genet.* 2008  
514 Feb;40(2):161–9.

- 515 36. Kathiresan S, Melander O, Guiducci C, Surti A, Burtt NP, Rieder MJ, et al. Six new loci  
516 associated with blood low-density lipoprotein cholesterol, high-density lipoprotein  
517 cholesterol or triglycerides in humans. *Nat Genet.* 2008 Feb;40(2):189–97.
- 518 37. Li Y, Willer C, Sanna S, Abecasis G. Genotype imputation. *Annu Rev Genomics Hum Genet.*  
519 2009;10:387–406.
- 520 38. Erbe M, Hayes BJ, Matukumalli LK, Goswami S, Bowman PJ, Reich CM, et al. Improving  
521 accuracy of genomic predictions within and between dairy cattle breeds with imputed high-  
522 density single nucleotide polymorphism panels. *J Dairy Sci.* 2012 Jul;95(7):4114–29.
- 523 39. Yang J, Bakshi A, Zhu Z, Hemani G, Vinkhuyzen AAE, Lee SH, et al. Genetic variance  
524 estimation with imputed variants finds negligible missing heritability for human height and  
525 body mass index. *Nat Genet.* 2015 Oct;47(10):1114–20.
- 526 40. Friedenberg SG, Meurs KM. Genotype imputation in the domestic dog. *Mamm Genome.*  
527 2016 Oct 1;27(9–10):485–94.
- 528 41. Howie BN, Donnelly P, Marchini J. A Flexible and Accurate Genotype Imputation Method for  
529 the Next Generation of Genome-Wide Association Studies. *PLOS Genet.* 2009 Jun  
530 19;5(6):e1000529.
- 531 42. Browning BL, Browning SR. A Unified Approach to Genotype Imputation and Haplotype-  
532 Phase Inference for Large Data Sets of Trios and Unrelated Individuals. *Am J Hum Genet.*  
533 2009 Feb 13;84(2):210–23.
- 534 43. Shearin AL, Ostrander EA. Leading the way: canine models of genomics and disease. *Dis*  
535 *Model Mech.* 2010 Jan 1;3(1–2):27–34.
- 536 44. Li H, Durbin R. Fast and accurate short read alignment with Burrows–Wheeler transform.  
537 *Bioinformatics.* 2009 Jul 15;25(14):1754–60.

- 538 45. Browning BL, Browning SR. Genotype Imputation with Millions of Reference Samples. *Am J*  
539 *Hum Genet.* 2016 Jan 7;98(1):116–26.
- 540 46. McKenna A, Hanna M, Banks E, Sivachenko A, Cibulskis K, Kernytsky A, et al. The Genome  
541 Analysis Toolkit: A MapReduce framework for analyzing next-generation DNA sequencing  
542 data. *Genome Res.* 2010 Sep 1;20(9):1297–303.
- 543 47. DePristo MA, Banks E, Poplin R, Garimella KV, Maguire JR, Hartl C, et al. A framework for  
544 variation discovery and genotyping using next-generation DNA sequencing data. *Nat*  
545 *Genet.* 2011 May;43(5):491–8.
- 546 48. Van der Auwera GA, Carneiro MO, Hartl C, Poplin R, del Angel G, Levy-Moonshine A, et al.  
547 From FastQ Data to High-Confidence Variant Calls: The Genome Analysis Toolkit Best  
548 Practices Pipeline. *Curr Protoc Bioinforma.* 2013;43:11.10.1-11.10.33.
- 549 49. Delaneau O, Howie B, Cox AJ, Zagury J-F, Marchini J. Haplotype Estimation Using  
550 Sequencing Reads. *Am J Hum Genet.* 2013 Oct 3;93(4):687–96.
- 551 50. Howie B, Fuchsberger C, Stephens M, Marchini J, Abecasis GR. Fast and accurate genotype  
552 imputation in genome-wide association studies through pre-phasing. *Nat Genet.* 2012  
553 Aug;44(8):955–9.
- 554 51. Perez F, Granger BE. IPython: A System for Interactive Scientific Computing. *Comput Sci*  
555 *Engg.* 2007 May;9(3):21–29.
- 556 52. Hunter JD. Matplotlib: A 2D Graphics Environment. *Comput Sci Eng.* 2007 May;9(3):90–5.
- 557 53. Purcell S, Neale B, Todd-Brown K, Thomas L, Ferreira MAR, Bender D, et al. PLINK: A Tool  
558 Set for Whole-Genome Association and Population-Based Linkage Analyses. *Am J Hum*  
559 *Genet.* 2007 Sep 1;81(3):559–75.

- 560 54. Zhou X, Stephens M. Genome-wide Efficient Mixed Model Analysis for Association Studies.  
561 Nat Genet. 2012 Jun 17;44(7):821–4.
- 562 55. Li M-X, Yeung JMY, Cherny SS, Sham PC. Evaluating the effective numbers of independent  
563 tests and significant p-value thresholds in commercial genotyping arrays and public  
564 imputation reference datasets. Hum Genet. 2011 Dec 6;131(5):747–56.
- 565 56. R Core Team. R: A Language and Environment for Statistical Computing. [Internet]. Vienna,  
566 Austria: R Foundation for Statistical Computing; 2013. Available from: [http://www.R-](http://www.R-project.org/)  
567 [project.org/](http://www.R-project.org/)
- 568 57. Venables WN, Ripley BD. Modern Applied Statistics with S. Fourth edition. New York:  
569 Springer; 2002.
- 570 58. Cingolani P, Platts A, Wang LL, Coon M, Nguyen T, Wang L, et al. A program for annotating  
571 and predicting the effects of single nucleotide polymorphisms, SnpEff. Fly (Austin). 2012  
572 Apr 1;6(2):80–92.
- 573 59. Campbell CL, Bhérer C, Morrow BE, Boyko AR, Auton A. A Pedigree-Based Map of  
574 Recombination in the Domestic Dog Genome. G3 GenesGenomesGenetics. 2016 Sep  
575 2;6(11):3517–24.

576

577 **Figures:**

578 Figure 1: Imputation accuracy for 33,144 variants of different allele frequency in mixed-breed  
579 dogs (blue), purebred dogs (green), and village dogs (red).

580 a) all sites, b) heterozygous sites only.

581

582 Figure 2: Scatter plots showing *P*-values for array GWAS (x axis) and imputed GWAS (y axis).

583 a) breed-average weight, b) breed-average height, c) individual weight, and d) absolute values of  
584 the effect sizes of the most-associated SNP for breed-average weight and breed-average height  
585 from the imputed GWAS.

586

587 Figure 3: Novel body size loci.

588 Linkage disequilibrium plots of the region around breed-average weight GWAS results

589 a) CFA9:12, b) CFA26:7. Array genotypes are shown as o, imputed data are shown as +. Colors  
590 indicate amount of LD with the most significantly associated SNP, ranging from black ( $r^2 < 0.2$ ) to  
591 red ( $r^2 > 0.8$ ).

592

593 Figure 4: Stepwise-covariate LD plots for breed-average weight imputed GWAS.

594 a) CFA7 (*SMAD2*), showing that the association signal in the region disappears with the inclusion  
595 of the top 4 SNPs as covariates. b)-d) Association signal in the region remains with the inclusion  
596 of the top 4 SNPs as covariates and then additional stepwise covariates in the region b) *LCORL*,  
597 c) *HMG2*. Array genotypes are shown as o, imputed data are shown as +. Colors indicate  
598 amount of LD with the most significantly associated SNP, ranging from black ( $r^2 < 0.2$ ) to red  
599 ( $r^2 > 0.8$ ).

600

601 Figure 5: LD plots for significant blood phenotypes.

602 a) albumin on CFA13, b) anion gap on CFA29, c) calcium on CFA37, d) sqrt glucose on CFA1, e)  
603 potassium on CFA8, f) white blood cells on CFA4, g) log ALT on CFA13, h) sqrt amylase on  
604 CFA6. Array genotypes are shown as o, imputed data are shown as +. Colors indicate amount of  
605 LD with the most significantly associated SNP, ranging from black ( $r^2 < 0.2$ ) to red ( $r^2 > 0.8$ ).

606

### 607 **Supporting Information:**

608 S1 Figure: Linkage Disequilibrium (LD) plots of the region around the breed-average weight QTL  
609 intervals that have been fine-mapped a) CFA3:41 near the gene *IGF1R*, b) CFA4:39 near the  
610 gene *STC2*, c) CFA4:67 near the gene *GHR*, d) CFA7:43 near the gene *SMAD2*, e) CFA10:8



611 near the gene *HMGA2*, f) CFA15:41 near the gene *IGF1*, g) CFA18:20, h) CFA32:5 near the  
612 gene *BMP3*, i) CFAX near the gene *IGSF1*. Dashed lines show the significant interval (defined by  
613 *P*-values within two orders of magnitude of the most associated SNP). Asterisks show the  
614 location of the causal locus. Note that for d), f), and g) the causal locus is a deletion, SINE  
615 insertion, and retrogene insertion respectively, so these locations are labeled with asterisks at the  
616 top of the plot.

617

618 S2 Figure: Linkage Disequilibrium (LD) plots of the region around the breed-average weight QTL  
619 intervals on a) CFA3:91 near the gene *LCORL* and *ANAPC13*, b) CFA7:30 near the gene *TBX19*.  
620 The significant interval, drawn with dashed vertical lines, is defined by *P*-values within two orders  
621 of magnitude of the most associated SNP. Array genotypes are shown as o, imputed data are  
622 shown as +. Arrows point to the most significant SNP in the array GWAS and imputed GWAS.  
623 Colors indicate amount of LD with the most significantly associated SNP, ranging from black  
624 ( $r^2 < 0.2$ ) to red ( $r^2 > 0.8$ ).

625

626 S1 Table: Imputation accuracy calculated for each chromosome for village dogs, mixed-breed  
627 dogs, and purebred dogs. Average recombination rate (cM/Mb) calculated from (59) for each  
628 chromosome is also shown.

629

630 S2 Table: *P*-values for body size GWAS QTLs using individual weight, breed-average weight, and  
631 breed-average height phenotypes with array genotypes and imputed panel. Novel body size loci  
632 are shown in bold.

633

634 S3 Table: Significant and nearly significant imputed GWAS results of blood phenotypes. Also  
635 shown is the location and *P*-value from the GWAS using the array genotype data.

636

637 S4 Table: List of Whole Genome Sequence (WGS) dog samples.

638

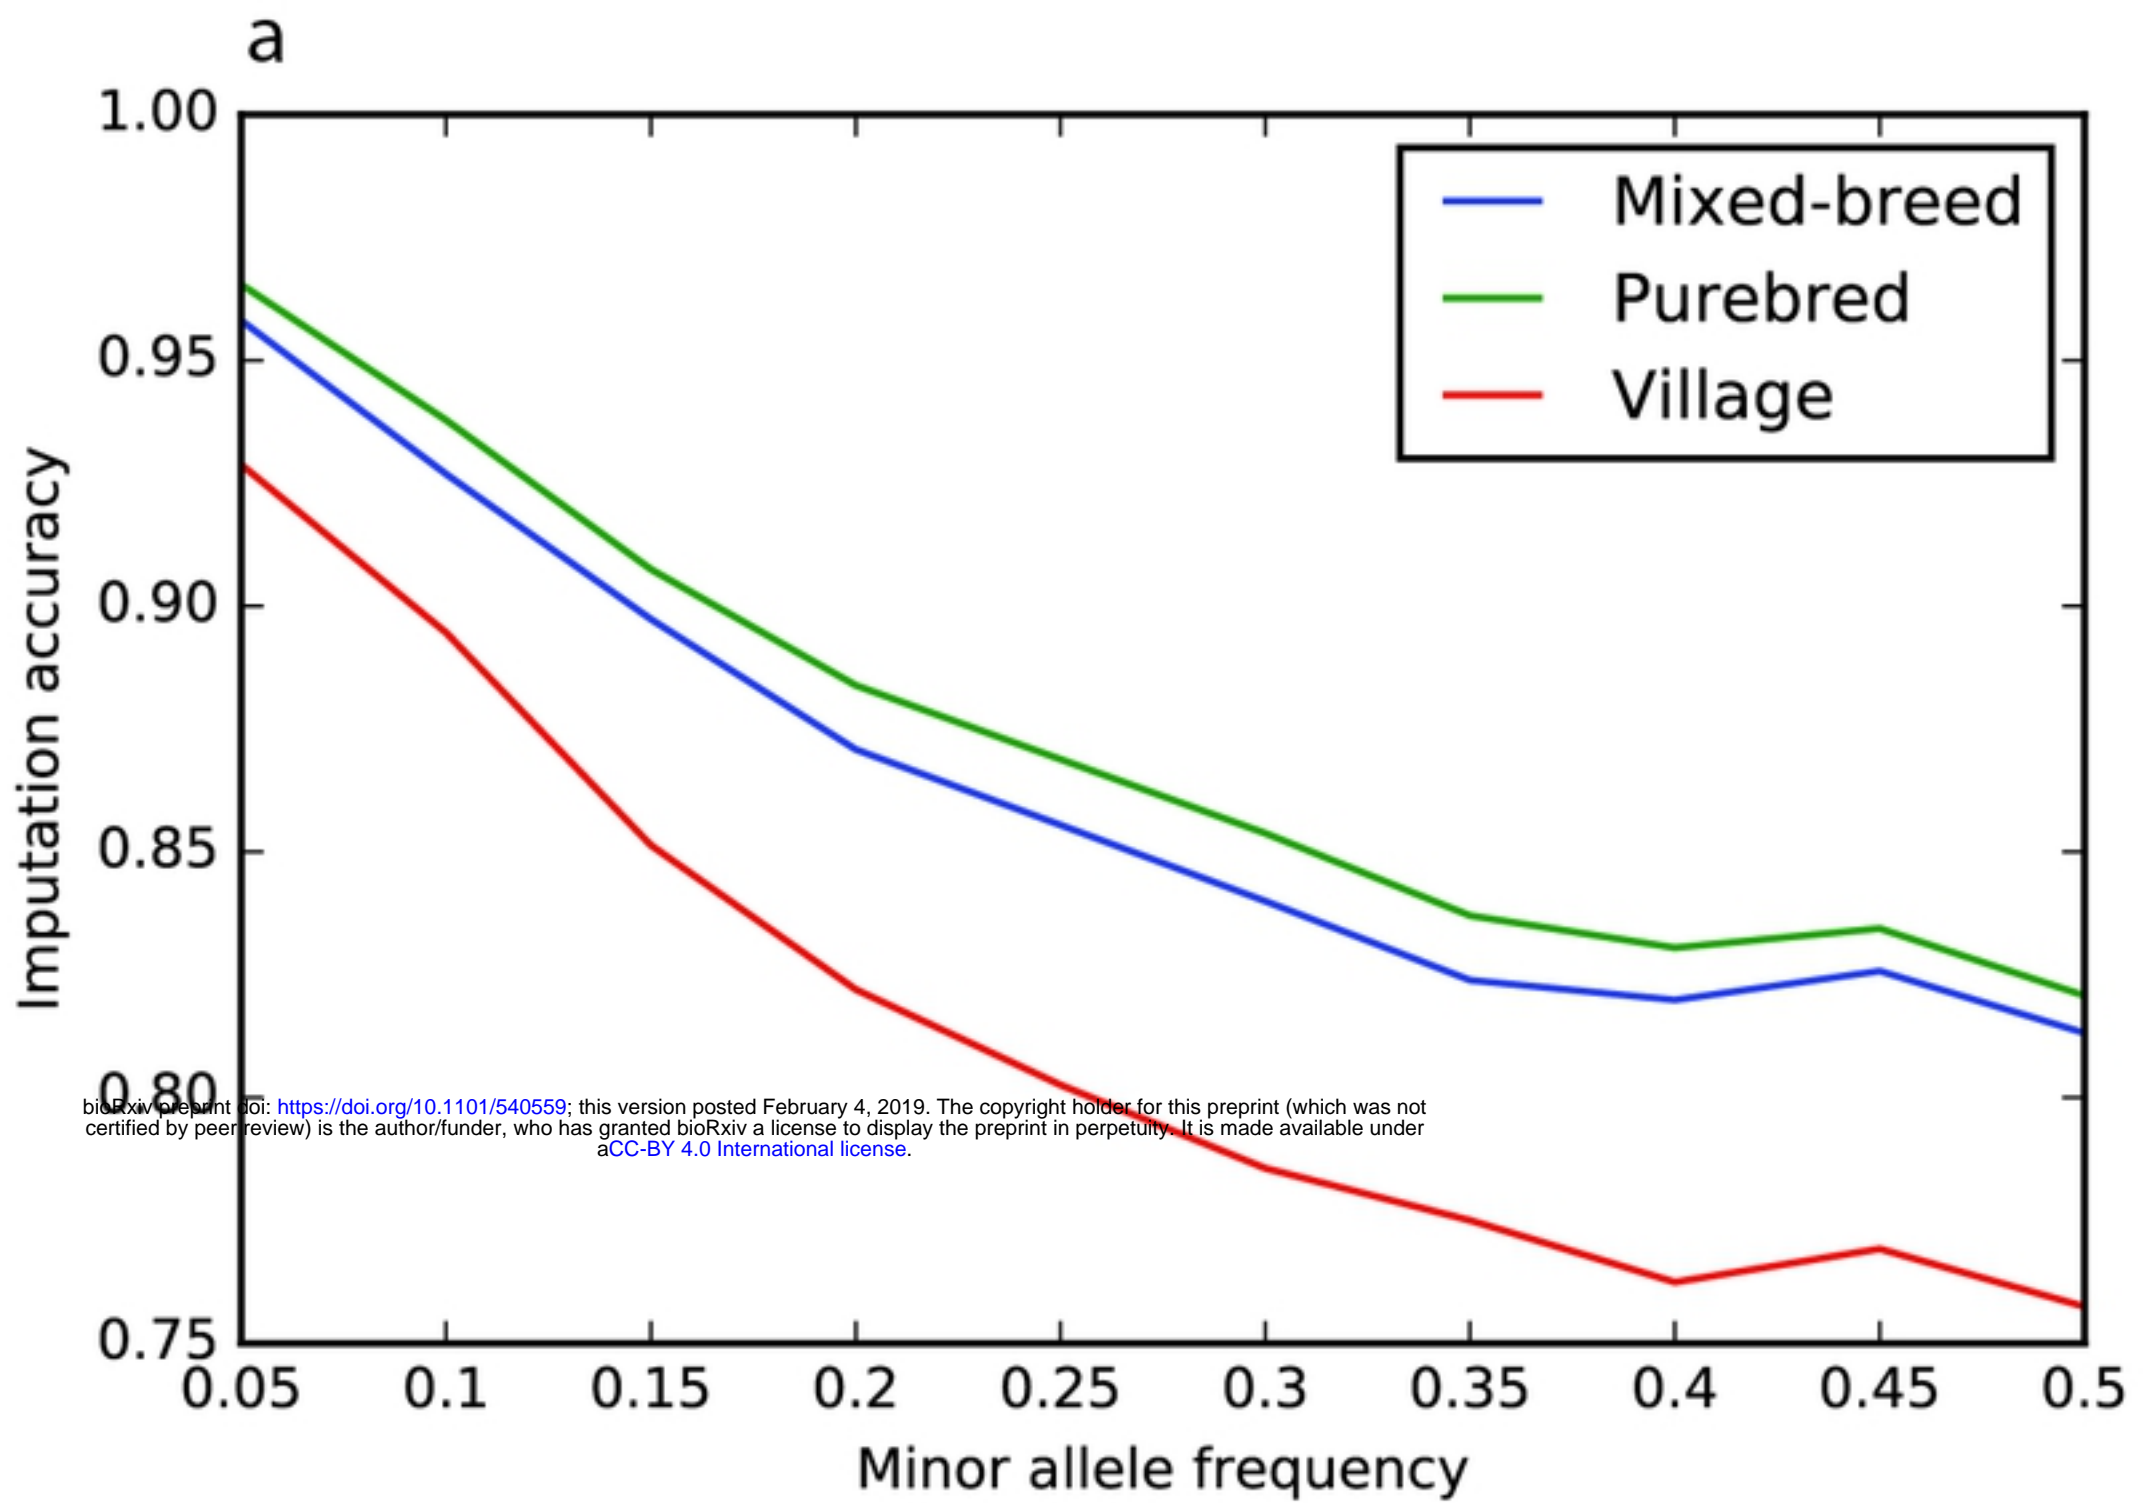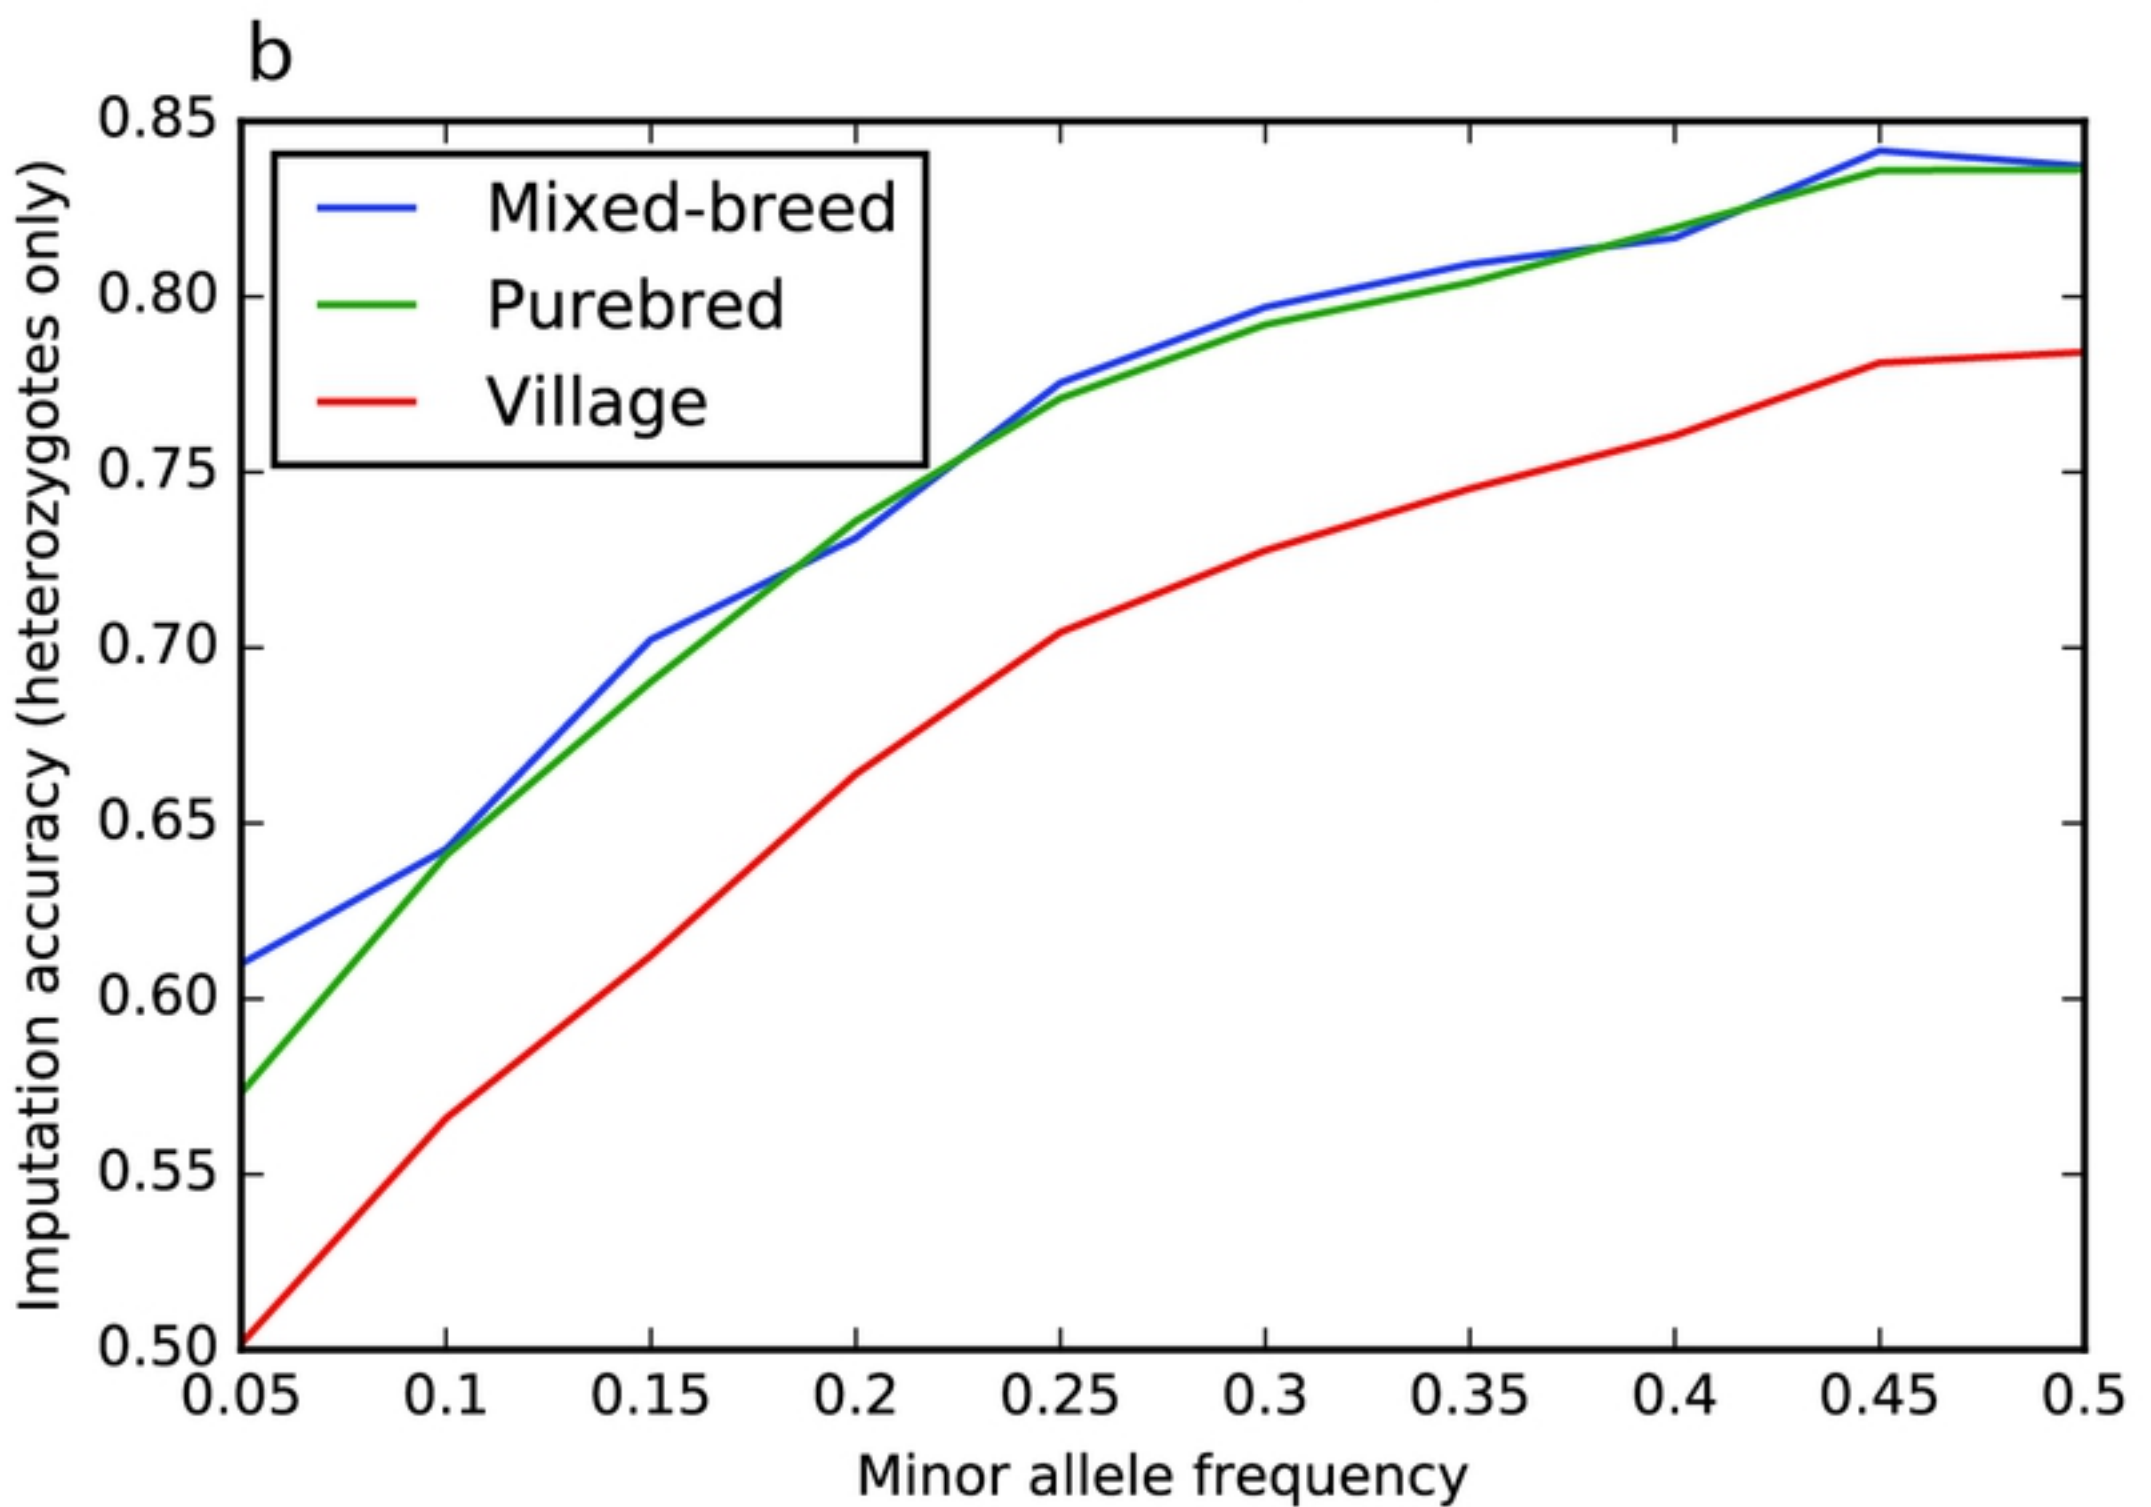

Figure 1

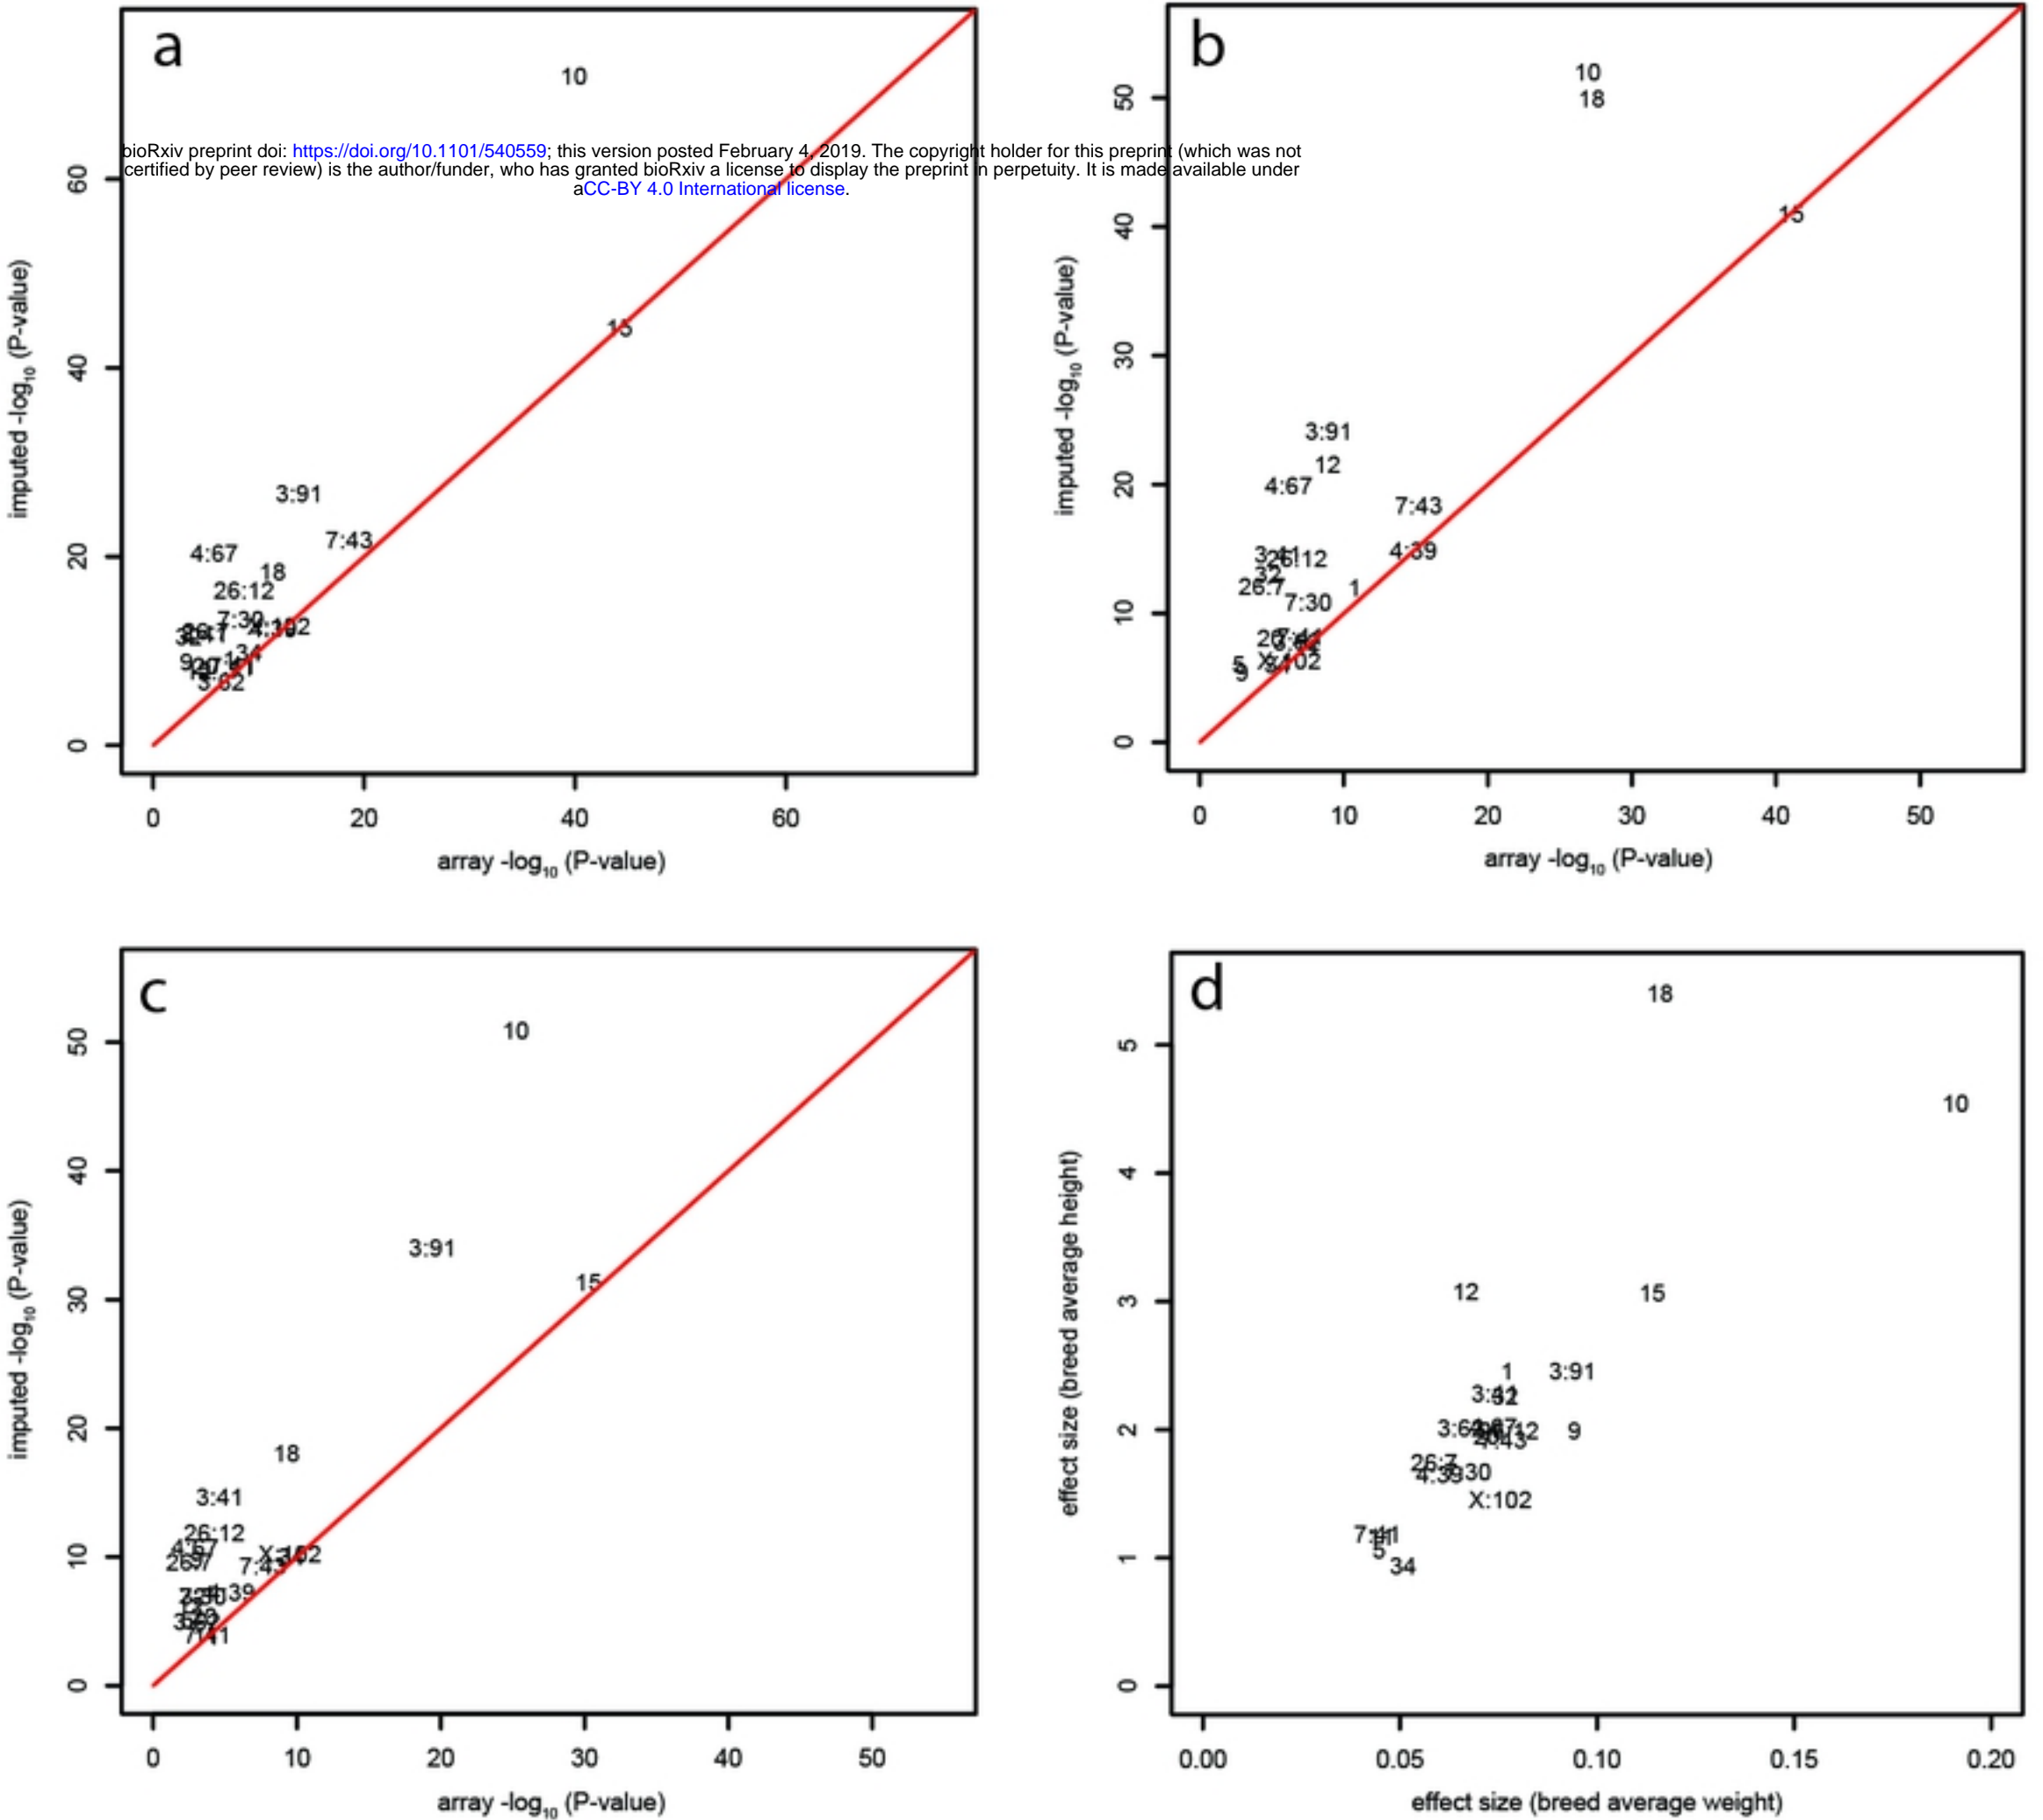

Figure 2

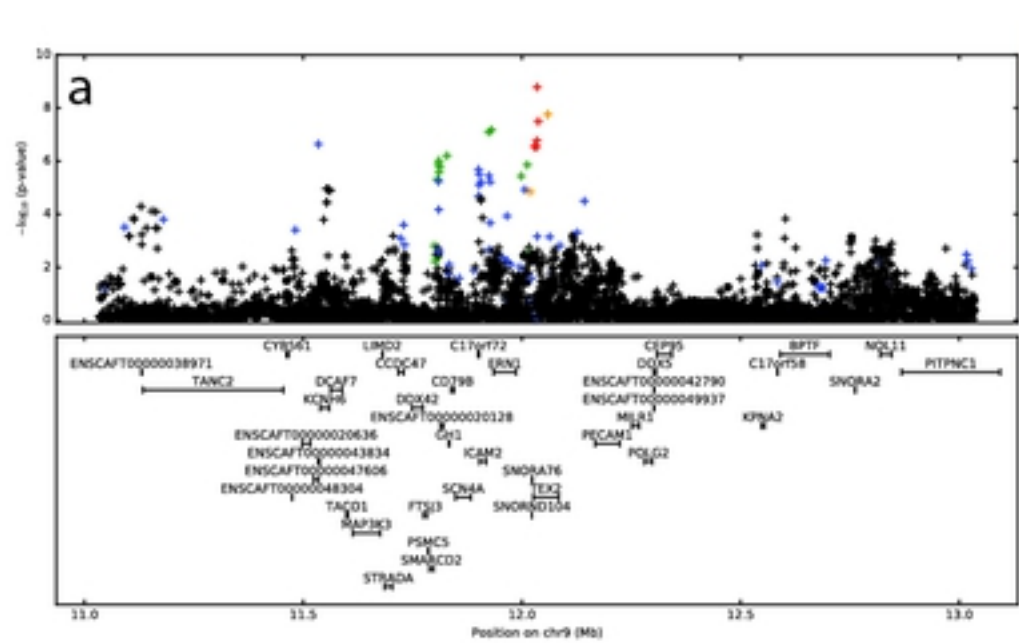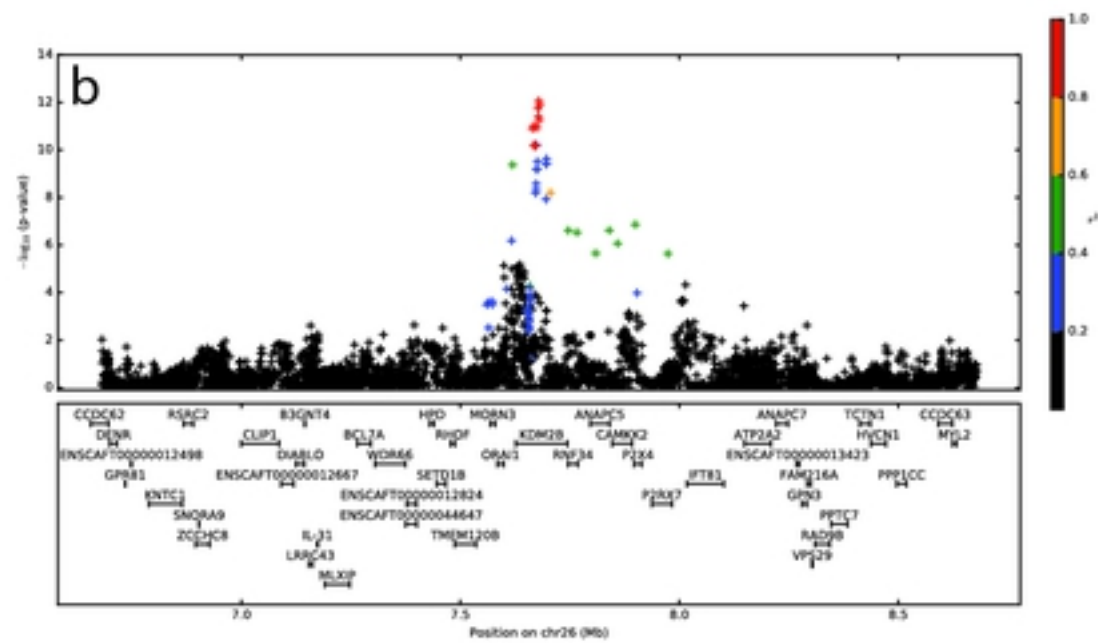

Figure 3

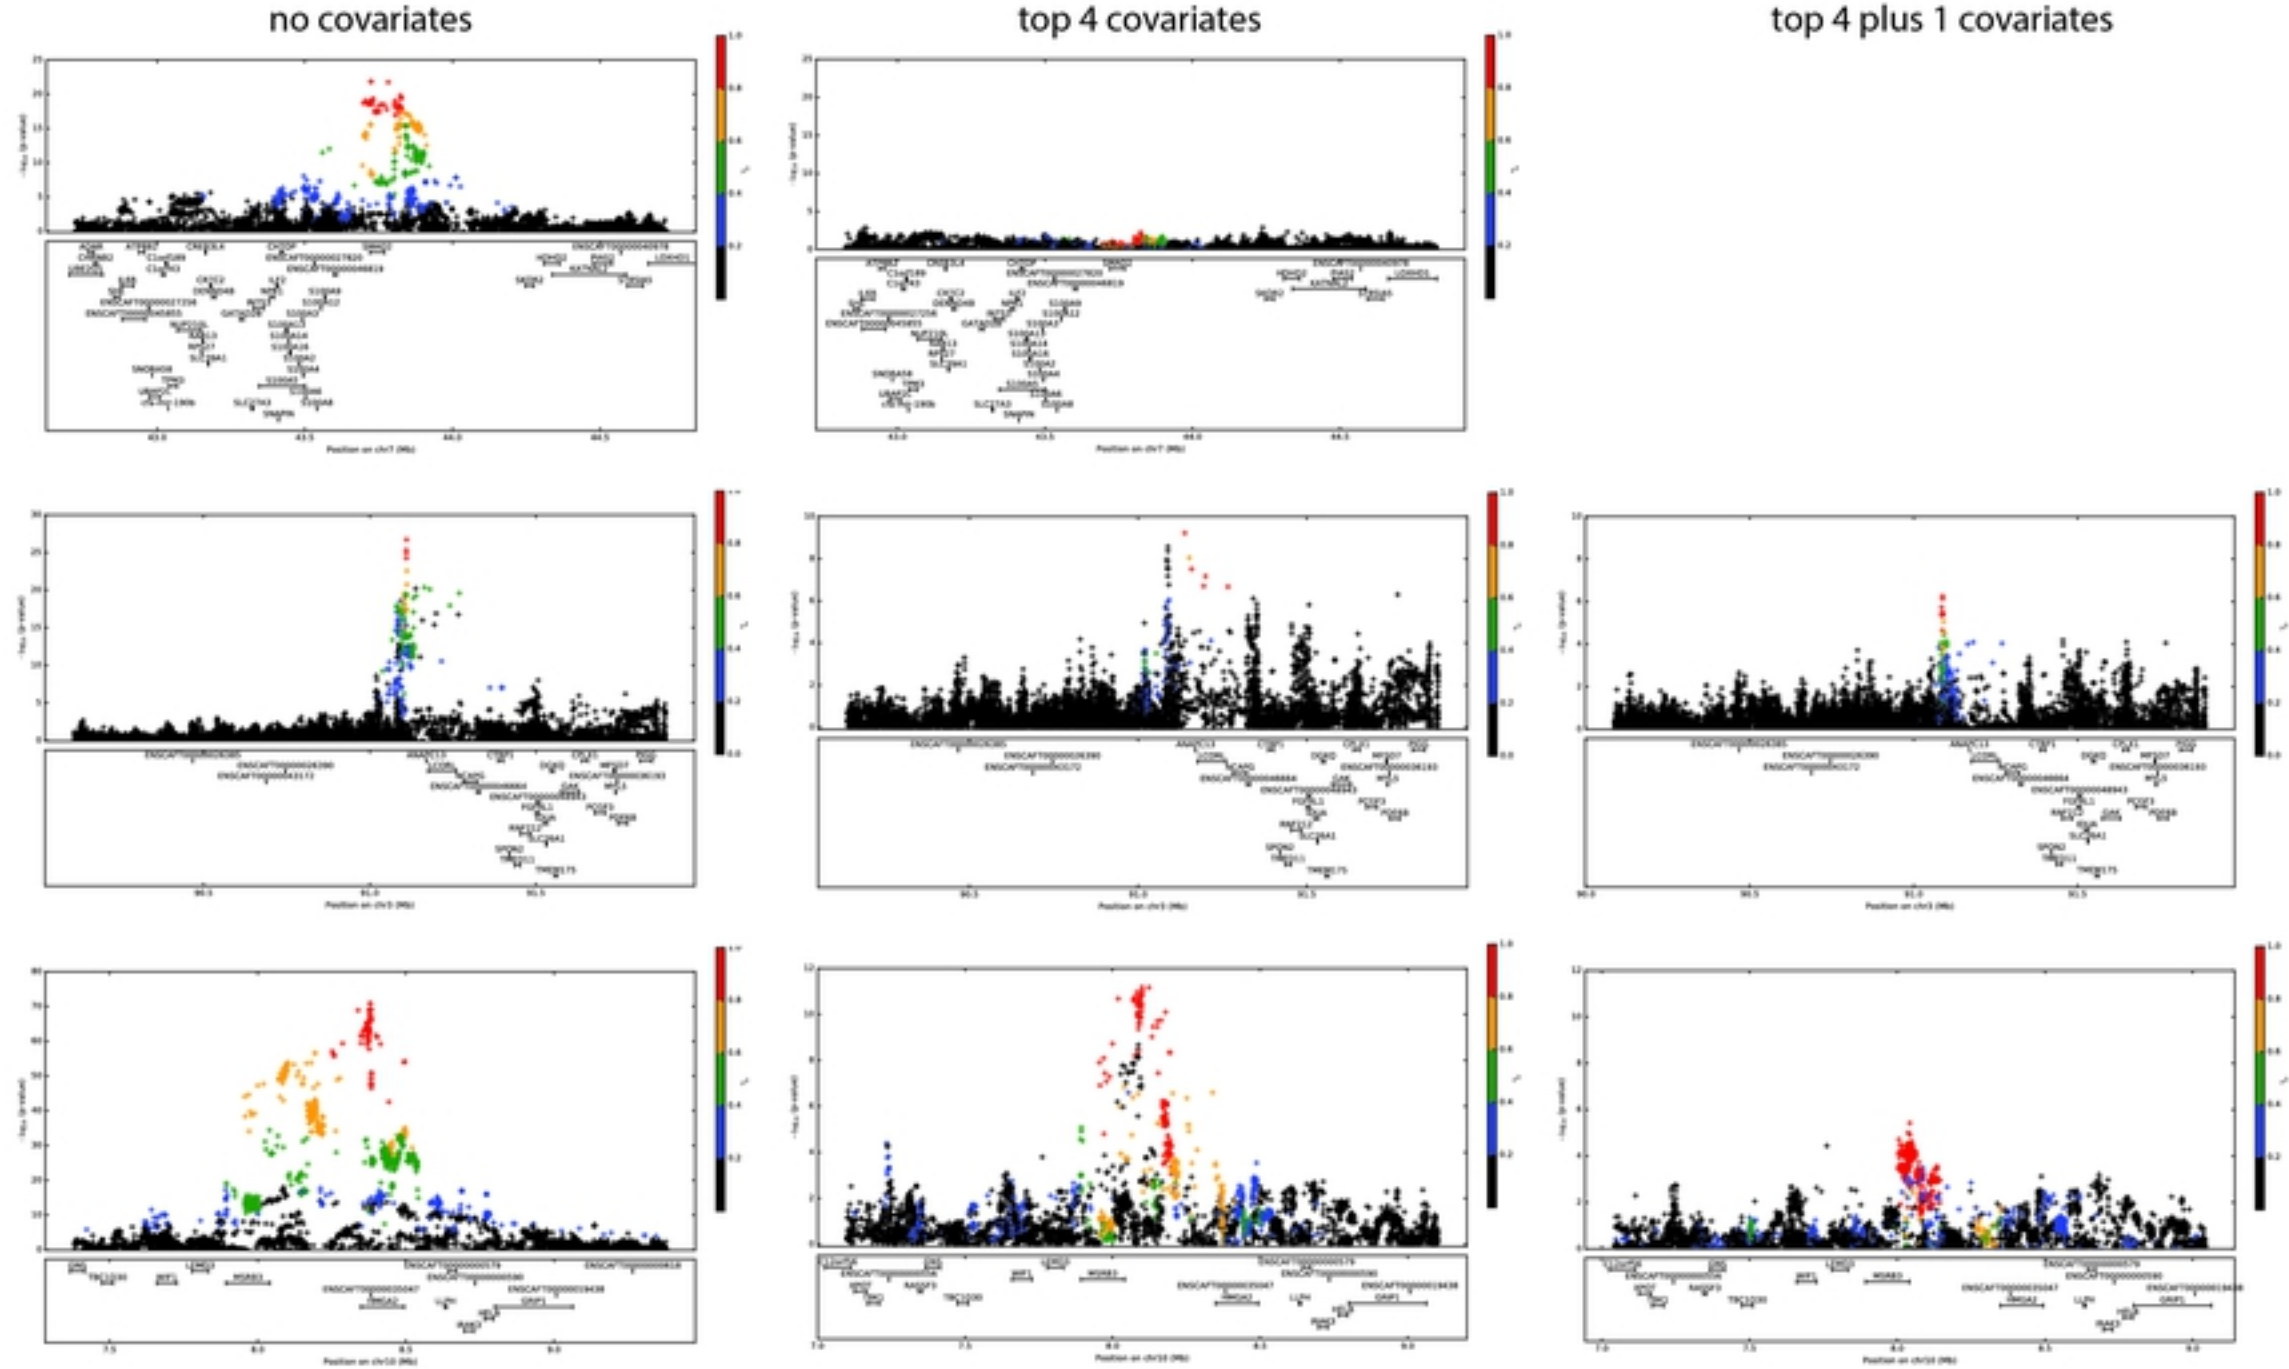

Figure 4
